# Supplementary material
Source: publisher figshare collection journal article supplement (https://sage.figshare.com/ndownloader/files/14617493)

**Appendix Figure 1.** (A) Osteogenic, chondrogenic and adipogenic differentiation potential as well as clonogenicity of rabbit ASCs before or after transduction with lentivirus vector carrying mCherry. (B) Phenotype characterization of ASCs. ASCs were positive for CD24, CD44 and CD90, but negative for CD31, CD45 and CD106.

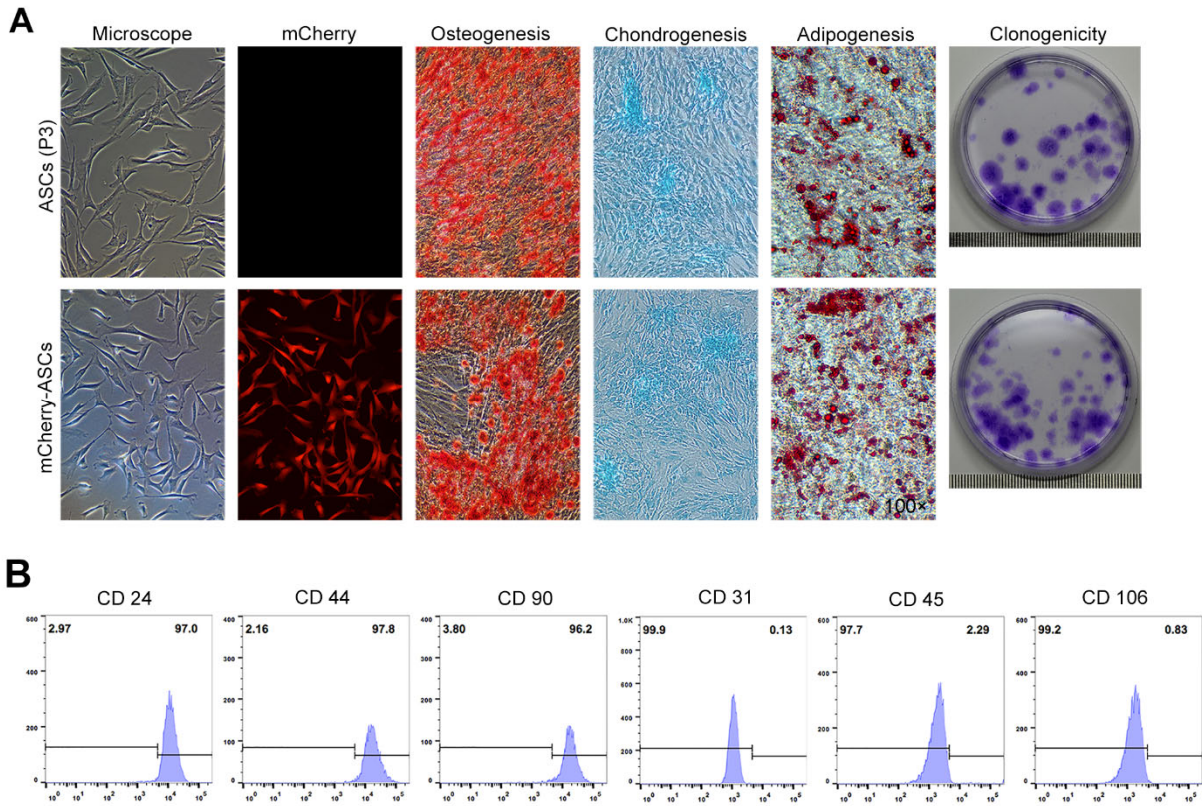

**Appendix Figure 2.** In-vivo tracking of mCherry-labeled ASCs with IHC staining at 8 weeks post-implantation. The yellow and white arrows respectively point to the representative fibrochondrocytes and osteoblasts that originated from the implanted ASCs. NB, newly-formed bone; RF, regenerated fibrocartilage layer; TF, patellar tendon. Scale bar = 40  $\mu$ m.

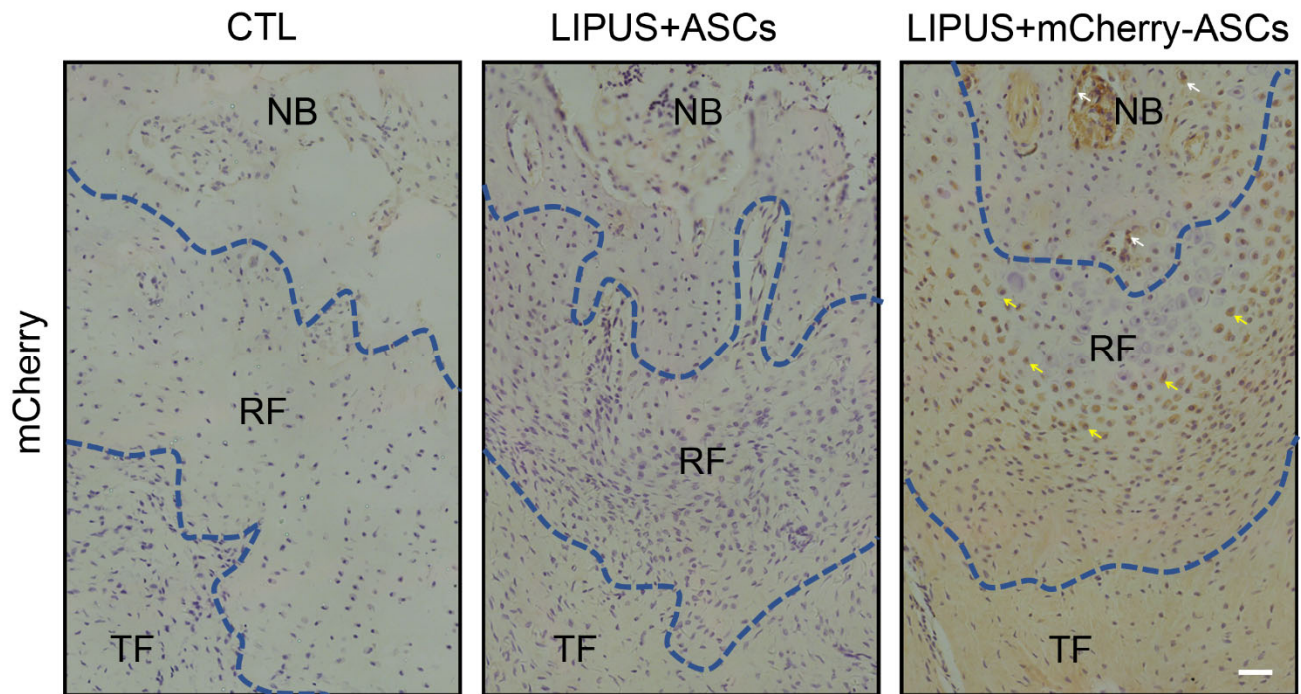

**Appendix Figure 3**

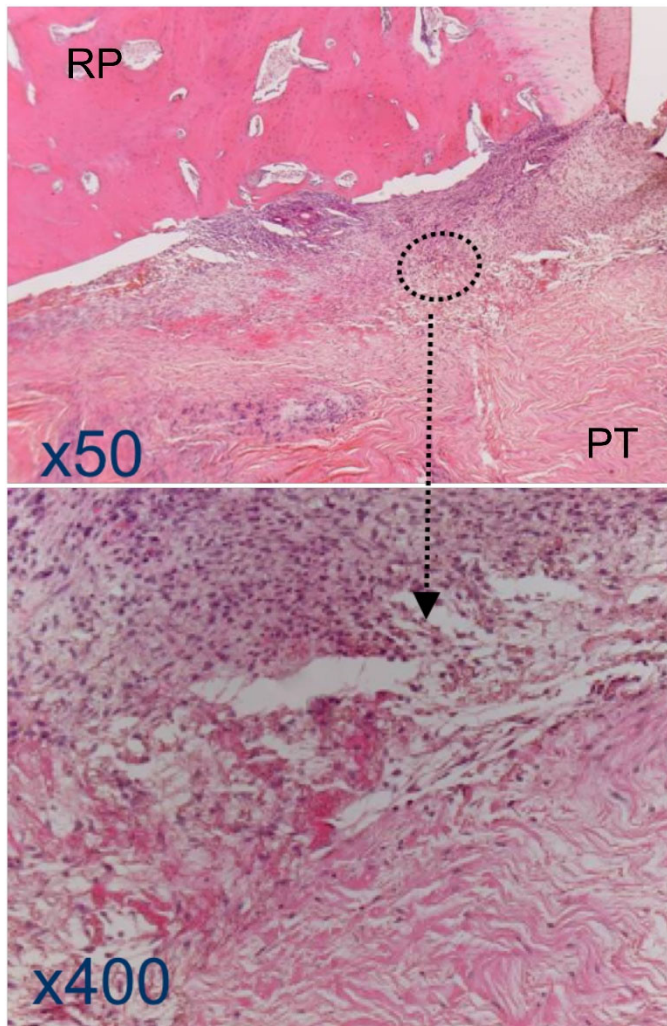

Supplement: Supplementary file 1 [file 14617493]
